# Supplementary material
Source: PubMed Central journal article supplement (PMC1420655)

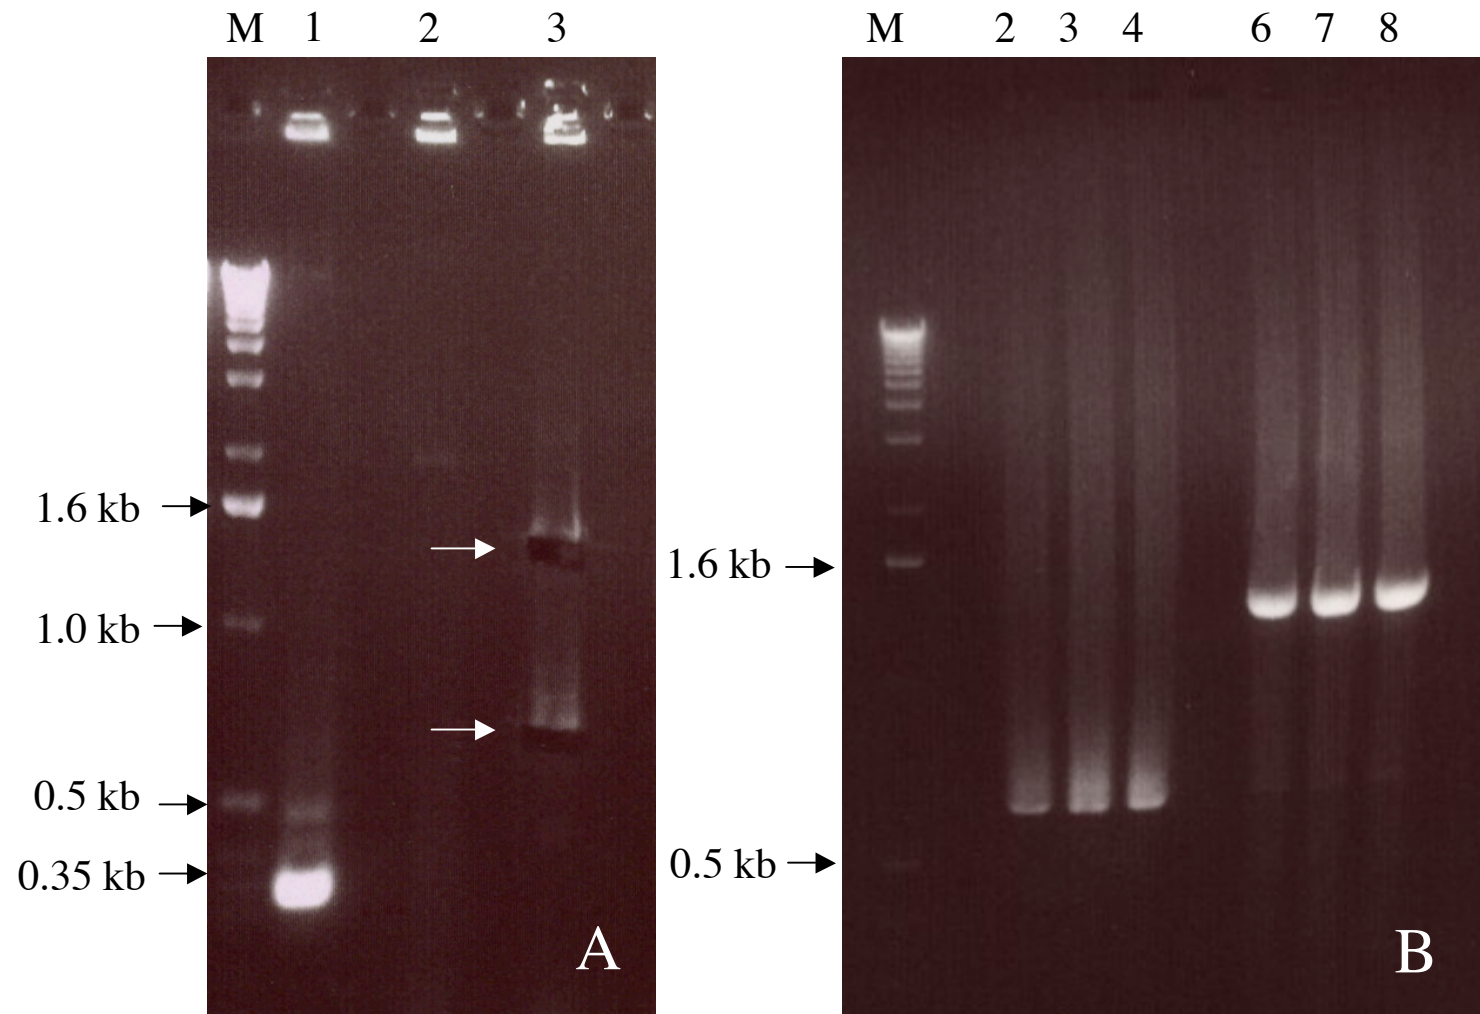

Figure S10

Supplement: pcbi.0020018.sg010.pdf [file pcbi.0020018.sg010.pdf]
